# Supplementary material for: Differentiation of Developmental Pathways Results in Different Life-History Patterns between the High and Low Latitudinal Populations in the Asian Corn Borer
Source: MDPI journal article supplement (doi:10.3390/insects13111026), 2022-11-06
Supplement: s1 [file s1]

**Table S1** Data of life history traits between non-diapause and diapause development in different geographical population of *Ostrinia furnacalis* at 25°C.

| Population | Development pathway    | Number | Larval time<br>(day) | Pupal time<br>(day) | Pupal weight<br>(mg) | Growth rate<br>((LNmg)/day) | Adult weight<br>(mg) | Weight loss<br>(%) |
|------------|------------------------|--------|----------------------|---------------------|----------------------|-----------------------------|----------------------|--------------------|
| HB         | Non-diapause (females) | 87     | 28.52 ± 0.57 jk      | 9.47 ± 0.12 cde     | 104.05 ± 2.23 b      | 7.28 ± 0.14 ab              | 62.83 ± 1.56 b       | 39.94 ± 0.59 i     |
|            | Non-diapause (males)   | 45     | 27.42 ± 0.65 jk      | 10.32 ± 0.11 a      | 76.94 ± 1.51 ij      | 7.01 ± 0.15 bc              | 35.15 ± 1.11 hi      | 54.41 ± 1.06 b     |
|            | Diapause (females)     | 94     | 106.12 ± 1.89 d      | 9.35 ± 0.15 def     | 80.86 ± 1.57 ghi     | 1.85 ± 0.04 gh              | 47.34 ± 1.13 fg      | 43.47 ± 0.83 gh    |
|            | Diapause (males)       | 41     | 105.83 ± 2.00 d      | 9.91 ± 0.09 abc     | 59.64 ± 1.80 m       | 1.70 ± 0.03 gh              | 29.41 ± 1.28 j       | 52.53 ± 1.34 bc    |
| SY         | Non-diapause (females) | 85     | 27.64 ± 0.49 jk      | 9.35 ± 0.09 def     | 98.69 ± 2.15 bc      | 7.36 ± 0.13 a               | 58.54 ± 1.47 bc      | 42.70 ± 0.74 ghi   |
|            | Non-diapause (males)   | 77     | 26.49 ± 0.43 k       | 9.93 ± 0.11 abc     | 75.18 ± 1.35 ijk     | 7.19 ± 0.11 abc             | 34.69 ± 0.71 hi      | 54.91 ± 0.40 b     |
|            | Diapause (females)     | 50     | 111.02 ± 3.23 bc     | 8.95 ± 0.18 fgh     | 80.79 ± 2.27 ghi     | 1.79 ± 0.05 gh              | 44.32 ± 1.81 g       | 45.32 ± 1.49 fg    |
|            | Diapause (males)       | 77     | 95.38 ± 1.83 e       | 9.42 ± 0.10 def     | 72.12 ± 1.45 jkl     | 1.99 ± 0.04 fg              | 33.27 ± 1.16 ij      | 53.84 ± 1.14 bc    |
| LF         | Non-diapause (females) | 40     | 30.80 ± 1.12 hijk    | 9.59 ± 0.13 bcd     | 113.02 ± 2.50 a      | 6.92 ± 0.21 c               | 70.69 ± 1.54 a       | 39.38 ± 0.68 i     |
|            | Non-diapause (males)   | 47     | 29.79 ± 0.77 ijk     | 10.33 ± 0.17 a      | 77.69 ± 1.59 hij     | 6.51 ± 0.15 d               | 36.48 ± 0.93 hi      | 53.52 ± 0.67 bc    |
|            | Diapause (females)     | 127    | 125.05 ± 1.55 a      | 8.66 ± 0.07 h       | 91.75 ± 1.11 de      | 1.60 ± 0.02 h               | 50.02 ± 0.91 ef      | 45.72 ± 0.66 fg    |
|            | Diapause (males)       | 129    | 112.29 ± 1.06 b      | 9.07 ± 0.07 efgh    | 70.07 ± 0.94 kl      | 1.66 ± 0.02 gh              | 29.59 ± 0.52 j       | 58.40 ± 0.58 a     |
| TA         | Non-diapause (females) | 74     | 35.64 ± 0.76 h       | 9.37 ± 0.14 def     | 96.05 ± 2.31 cd      | 5.75 ± 0.14 e               | 57.05 ± 1.45 cd      | 41.11 ± 0.68 hi    |
|            | Non-diapause (males)   | 93     | 34.67 ± 0.77 hi      | 9.95 ± 0.10 ab      | 75.50 ± 1.43 ijk     | 5.67 ± 0.15 e               | 37.49 ± 0.88 hi      | 52.47 ± 0.69 bc    |
|            | Diapause (females)     | 38     | 89.00 ± 1.87 f       | 8.85 ± 0.21 gh      | 84.71 ± 2.40 fg      | 2.19 ± 0.05 f               | 56.91 ± 3.20 cd      | 34.86 ± 2.17 j     |
|            | Diapause (males)       | 30     | 93.50 ± 2.15 e       | 9.90 ± 0.19 abc     | 67.67 ± 1.85 l       | 1.98 ± 0.05 fg              | 35.66 ± 2.49 hi      | 46.81 ± 2.92 ef    |
| HF         | Non-diapause (females) | 70     | 32.36 ± 0.73 hij     | 9.31 ± 0.15 def     | 100.12 ± 2.38 bc     | 6.39 ± 0.15 d               | 59.74 ± 1.61 bc      | 40.04 ± 0.81 i     |
|            | Non-diapause (males)   | 47     | 30.72 ± 0.95 hijk    | 10.15 ± 0.27 a      | 80.83 ± 1.43 ghi     | 6.45 ± 0.18 d               | 38.02 ± 0.89 hi      | 53.63 ± 0.92 bc    |
|            | Diapause (females)     | 103    | 107.20 ± 1.58 cd     | 9.60 ± 0.11 bcd     | 87.86 ± 1.82 ef      | 1.85 ± 0.03 gh              | 52.95 ± 1.72 de      | 40.66 ± 1.15 hi    |
|            | Diapause (males)       | 68     | 112.63 ± 2.07 b      | 10.17 ± 0.17 a      | 67.92 ± 1.54 l       | 1.66 ± 0.03 gh              | 33.70 ± 1.38 ij      | 51.50 ± 1.49 bcd   |
| YX         | Non-diapause (females) | 46     | 34.98 ± 0.99 h       | 9.36 ± 0.23 def     | 91.84 ± 2.12 de      | 5.82 ± 0.17 e               | 57.21 ± 1.41 cd      | 39.53 ± 0.78 i     |
|            | Non-diapause (males)   | 38     | 34.66 ± 1.14 hi      | 9.90 ± 0.28 abc     | 76.01 ± 1.77 ijk     | 5.65 ± 0.19 e               | 39.37 ± 1.16 h       | 48.89 ± 1.11 de    |
|            | Diapause (females)     | 42     | 85.81 ± 1.31 fg      | 9.24 ± 0.13 defg    | 83.25 ± 2.55 fgh     | 2.25 ± 0.04 f               | 50.57 ± 1.69 ef      | 40.47 ± 1.12 hi    |
|            | Diapause (males)       | 72     | 83.42 ± 0.83 g       | 10.30 ± 0.10 a      | 68.24 ± 1.02 l       | 2.21 ± 0.02 f               | 34.22 ± 0.93 i       | 50.74 ± 1.29 cd    |

**Larval time:**  $df=23,1594$ ,  $F=730.230$ ,  $P < 0.001$ ; **Pupal time:**  $df=23,1366$ ,  $F=13.636$ ,  $P < 0.001$ ; **Pupal weight:**  $df=23,1588$ ,  $F=49.444$ ,  $P < 0.001$ ; **Growth rate:**  $df=23,1586$ ,  $F=559.325$ ,  $P < 0.001$ ;

**Adult weight:**  $df=23,1279$ ,  $F=75.800$ ,  $P < 0.001$ ; **Weight loss:**  $df=23,1278$ ,  $F=46.617$ ,  $P < 0.001$ .

Note: all means are given with Mean ± Standard error (SE).
